# Supplementary material
Source: ML conference proceedings conference paper supplement (https://www.ecva.net/papers/eccv_2022/papers_ECCV/html/136930087_ECCV_2022_paper.php)
Supplement: Supplementary file 3 [file 136930087-supp.zip]

Archive with 7 entries (6 files):
- 6129-supp/
- 6129-supp/video_demo.mp4
- __MACOSX/6129-supp/._video_demo.mp4
- 6129-supp/.DS_Store
- __MACOSX/6129-supp/._.DS_Store
- 6129-supp/6129-supp.pdf
- __MACOSX/6129-supp/._6129-supp.pdf
